# Supplementary material for: Resilience, Perceived Stress from Adapted Medical Education Related to Depression among Medical Students during the COVID-19 Pandemic
Source: Healthcare (Basel). 2023 Jan 12;11(2):237. doi: 10.3390/healthcare11020237 (PMC9859097; doi:10.3390/healthcare11020237)
Supplement: Supplementary file 1 [file healthcare-11-00237-s001.zip › Material S2.pdf]

| Perceived stress of AMEC                                                              |                 |      |          |        |
|---------------------------------------------------------------------------------------|-----------------|------|----------|--------|
| <b>Instruction:</b> Please rate to what extent the following events causes you stress | level of stress |      |          |        |
| <b>Loss opportunity for clinical practices and experiments,</b>                       | No impact       | Mild | Moderate | Severe |
| <b>Lack of peer contact</b>                                                           | No impact       | Mild | Moderate | Severe |
| <b>Lack of face-to-face communication with teachers</b>                               | No impact       | Mild | Moderate | Severe |
| <b>Online examination</b>                                                             | No impact       | Mild | Moderate | Severe |
