# Supplementary material for: Resilience, Perceived Stress from Adapted Medical Education Related to Depression among Medical Students during the COVID-19 Pandemic
Source: Healthcare (Basel). 2023 Jan 12;11(2):237. doi: 10.3390/healthcare11020237 (PMC9859097; doi:10.3390/healthcare11020237)
Supplement: Supplementary file 1 [file healthcare-11-00237-s001.zip › Material S3.pdf]

## RI-9

**Instruction:** Consider the following statements, how well they describe your thoughts and expressions by marking ✓ in the box that best matches your thoughts and expressions

- 1 = does not describe me at all  
2 = does not quite describe me  
3 = describe me somewhat  
4 = describe me quite well  
5 = describe me very well

| Feelings and expressions that describe you                               | 1                        | 2                        | 3                        | 4                        | 5                        |
|--------------------------------------------------------------------------|--------------------------|--------------------------|--------------------------|--------------------------|--------------------------|
| 1. I believe that I must overcome the obstacles I face.                  | <input type="checkbox"/> |
| 2. I can withstand the pressure.                                         | <input type="checkbox"/> |
| 3. I am proud that I can overcome all the bad things in life.            | <input type="checkbox"/> |
| 4. I believe I have the ability to overcome obstacles.                   | <input type="checkbox"/> |
| 5. When faced with a problem, it made me active to fight.                | <input type="checkbox"/> |
| 6. No matter what happens, I believe that I am always fully aware of it. | <input type="checkbox"/> |
| 7. I think I can overcome the problem because I am a talented person.    | <input type="checkbox"/> |
| 8. I considered the period when the problem caused me to learn.          | <input type="checkbox"/> |
| 9. I believe that in times of crisis there is always an opportunity.     | <input type="checkbox"/> |
